# Supplementary material
Source: PubMed Central journal article supplement (PMC4325769)
Supplement: AAC.04503-14_zac003153761so1.pdf [file AAC.04503-14_zac003153761so1.pdf]

---

**Supplementary Table 1: Oligonucleotide primers used in this study**

---

| Primer name | Sequence (5'-3')                                    |
|-------------|-----------------------------------------------------|
| gyrA1       | AATGAGTGTTATAGCTGGACG                               |
| gyrA2       | TCTTTTAACGACTCATCAAAGTT                             |
| gyrB1       | AGTTGATGAACTGGGGTCTT                                |
| gyrB2       | TCAAAATCTTCTCCAATACCA                               |
| AE_gyrA1    | GGTATGTTTATGCAGCACAGCCACC                           |
| AE_gyrA2    | TAACTCTGCTATTCTTTCAACCAGTTTAGCC                     |
| AE_gyrB1    | GGTTGATGATTGTTTTGTTGAACTAGCTATGC                    |
| AE_gyrB2    | CTTGAGCAACCTTATCACCCATAAGC                          |
| SC7_F       | GACGGATTTACATTTGCCGTTTTGTAAACGAATTGCAGG             |
| SC7_R       | AGATCCTTTGATCTTTTCTACGGGGTCTGACGCTCAGTGG            |
| promF       | TTTTTTGTTTAAACCAGACATGAAGGAGTTGTCTTTTGTAGAAAATTTTTC |
| promR_T82   | AATTTTCATCTAATAGTTCCTCCTTGTCACTATTTTAAACAAATTCC     |
| promR_D426  | GTATAACCATCTGAATAGTTCCTCCTTGTCACTATTTTAAACAAATTCC   |
| T82_LF      | GGAGGAACTATTAGATGAAATTGGAAGAAATGGTGTGTAAC           |
| T82I_LR     | TAAACAGCAATATCTCCATGAGGATGGTAC                      |
| T82V_LR     | TAAACAGCAACATCTCCATGAGGATGGTAC                      |
| T82_RR      | TTTTTTGTTTAAACCTTCTATAAAAGCTCTAGACCTAAC             |
| T82I_RF     | CATGGAGATATTGCTGTTTATTATGCTATGG                     |
| T82V_RF     | CATGGAGATGTTGCTGTTTATTATGCTATGG                     |
| D426_LF     | GGAGGAACTATTTATACAGGTGGTTTGGTAGAATATATTAAG          |
| D426N_LR    | CCTCCCGCTGAATTCCCTTCGACTAAG                         |
| D426V_LR    | CCTCCCGCTGAAACCCCTTCGACTAAG                         |
| D426_RR     | TTTTTTGTTTAAACCTATATATCTAAGTTTCTAACAAATCTTGC        |
| D426N_RF    | CTTAGTCGAAGGGAATTCAGCGGGAGG                         |
| D426V_RF    | CTTAGTCGAAGGGGTTTCAGCGGGAGG                         |

---
